# Supplementary material for: The function of RAD52 N-terminal domain is essential for viability of BRCA-deficient cells
Source: PubMed Central journal article supplement (PMC7736796; doi:10.1093/nar/gkaa1145), 2020-12-04
Supplement: gkaa1145_supplemental_file.pdf [file gkaa1145_supplemental_file.pdf]

## Supplementary information

### The essential function of RAD52 protein for viability of BRCA-deficient cells

Kritika Hanamshet and Alexander V. Mazin.

*Department of Biochemistry and Molecular Biology, Drexel University College of Medicine, Philadelphia, PA 19102, USA.*

\*Corresponding Author:  
Alexander Mazin, Ph. D.  
Drexel University College of Medicine  
Department of Biochemistry and Molecular Biology  
245 N 15<sup>th</sup> Street, MS 497, NCB, Room 10103  
Philadelphia, PA 19102-1192  
Tel: 215-762-7195; Fax: 215-762-4452  
E-mail: avm28@drexel.edu

#### Contents:

1. Supplementary Figures S1-S5
2. Supplementary Table S1

Figure S1

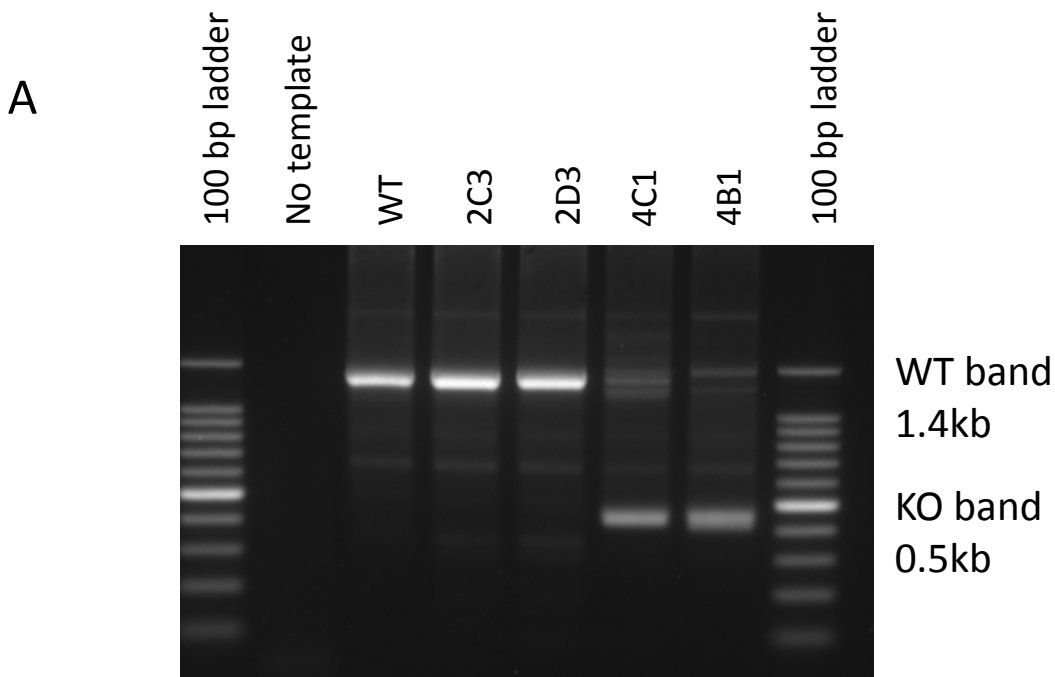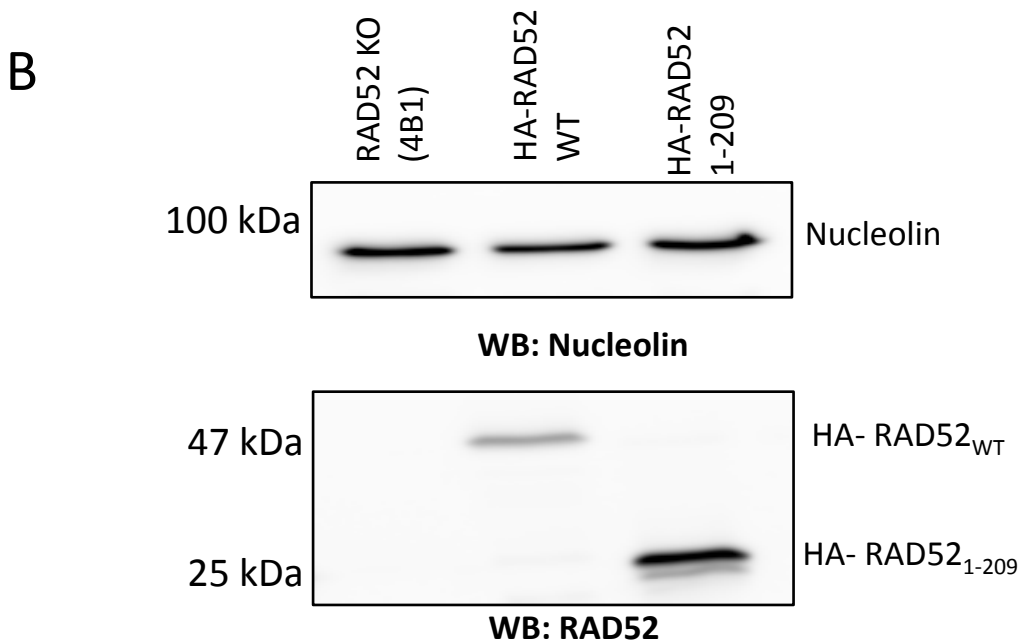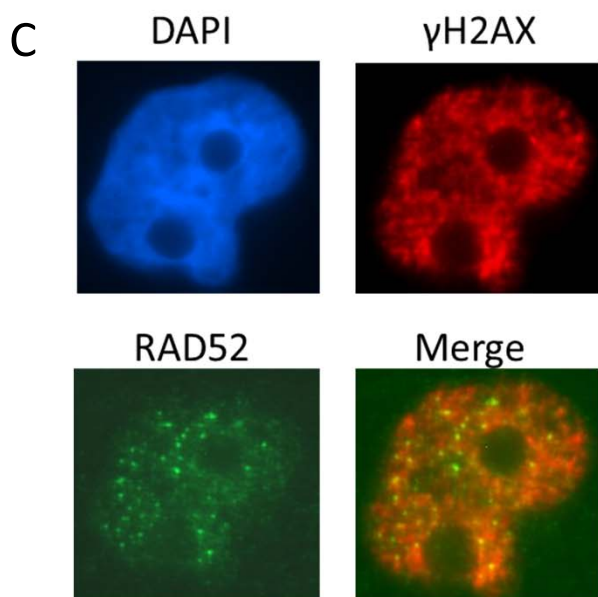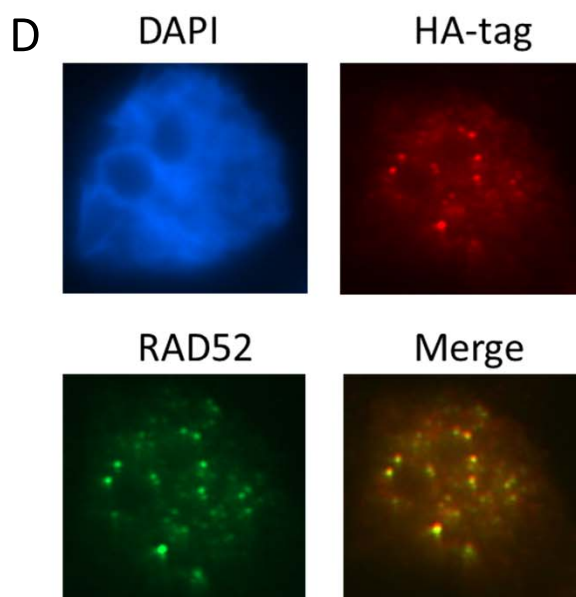

MDA-MB-436 cells expressing shRAD52 and exogenous HA-RAD52<sub>1-209</sub>

## Figure S1

$RAD52_{1-209}$  forms foci in response cisplatin treatment. (A) Knock-out of *RAD52* by CRISPR-Cas9 in different U2OS cell clones was confirmed by PCR. (B) The expression of exogenous HA- $RAD52_{WT}$  or HA- $RAD52_{1-209}$  proteins in 4B1 U2OS cell clone was confirmed by Western blot. (C) and (D) Representative images of MDA-MB-436 cells stably expressing  $RAD52_{1-209}$  and sh $RAD52$ , stained 6 h after cisplatin (10  $\mu$ M) treatment with DAPI (blue), or probed with fluorescent anti-bodies for  $RAD52$  (green),  $\gamma$ -H2AX (red) in (C), and  $RAD52$  (green), HA-tag (red) in (D).

Figure S2

A

MDA-MB-436 cells treated with shRAD52 targeting 3'UTR

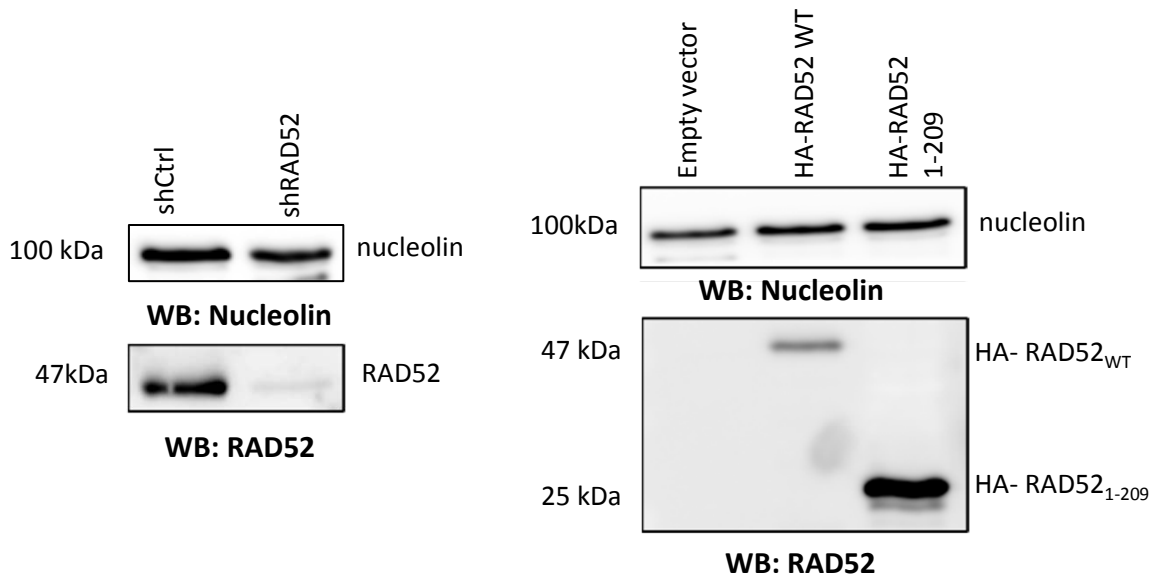

B

HCC1937 cells treated with shRAD52 targeting 3'UTR

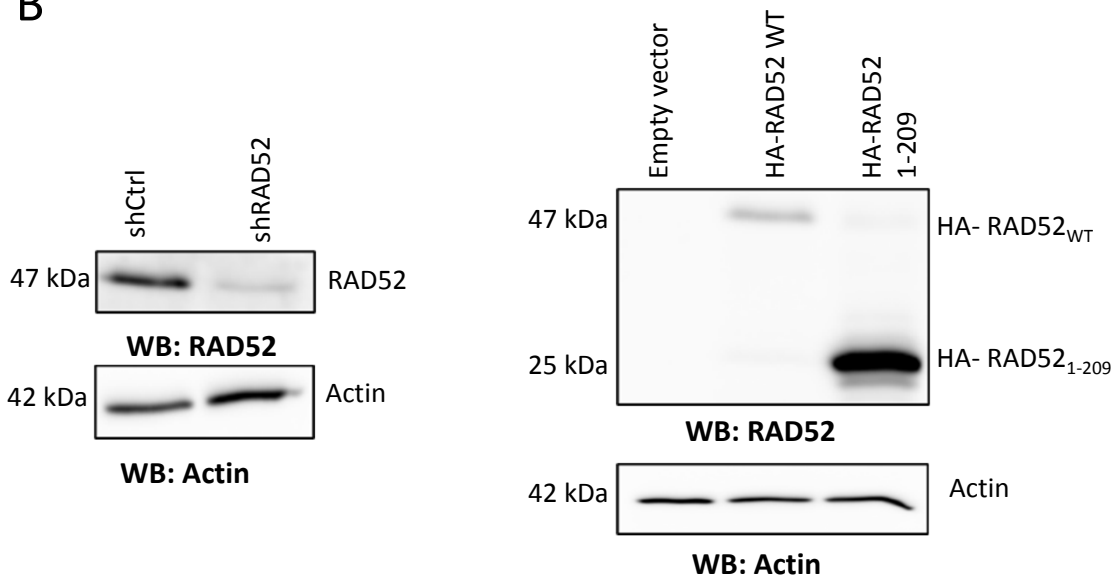

C

CAPAN1 cells treated with shRAD52 targeting 3'UTR

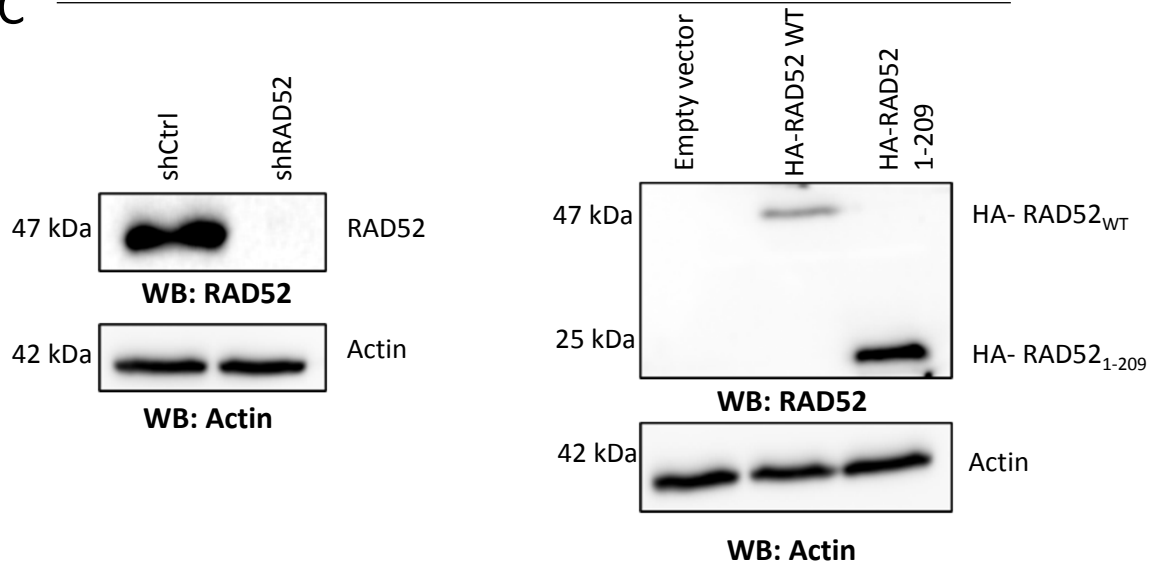

## Figure S2

Western blot analysis of knock-down of endogenous RAD52. Cells treated with shRAD52 and control shRNA (shCtrl) (left panels) and expression of exogenous HA-RAD52<sub>WT</sub> or HA-RAD52<sub>1-209</sub> in the cells treated with shRAD52 (right panels) in MD-MB-436 (A), HCC1937 (B), and CAPAN1 (C) cells.

Figure S3

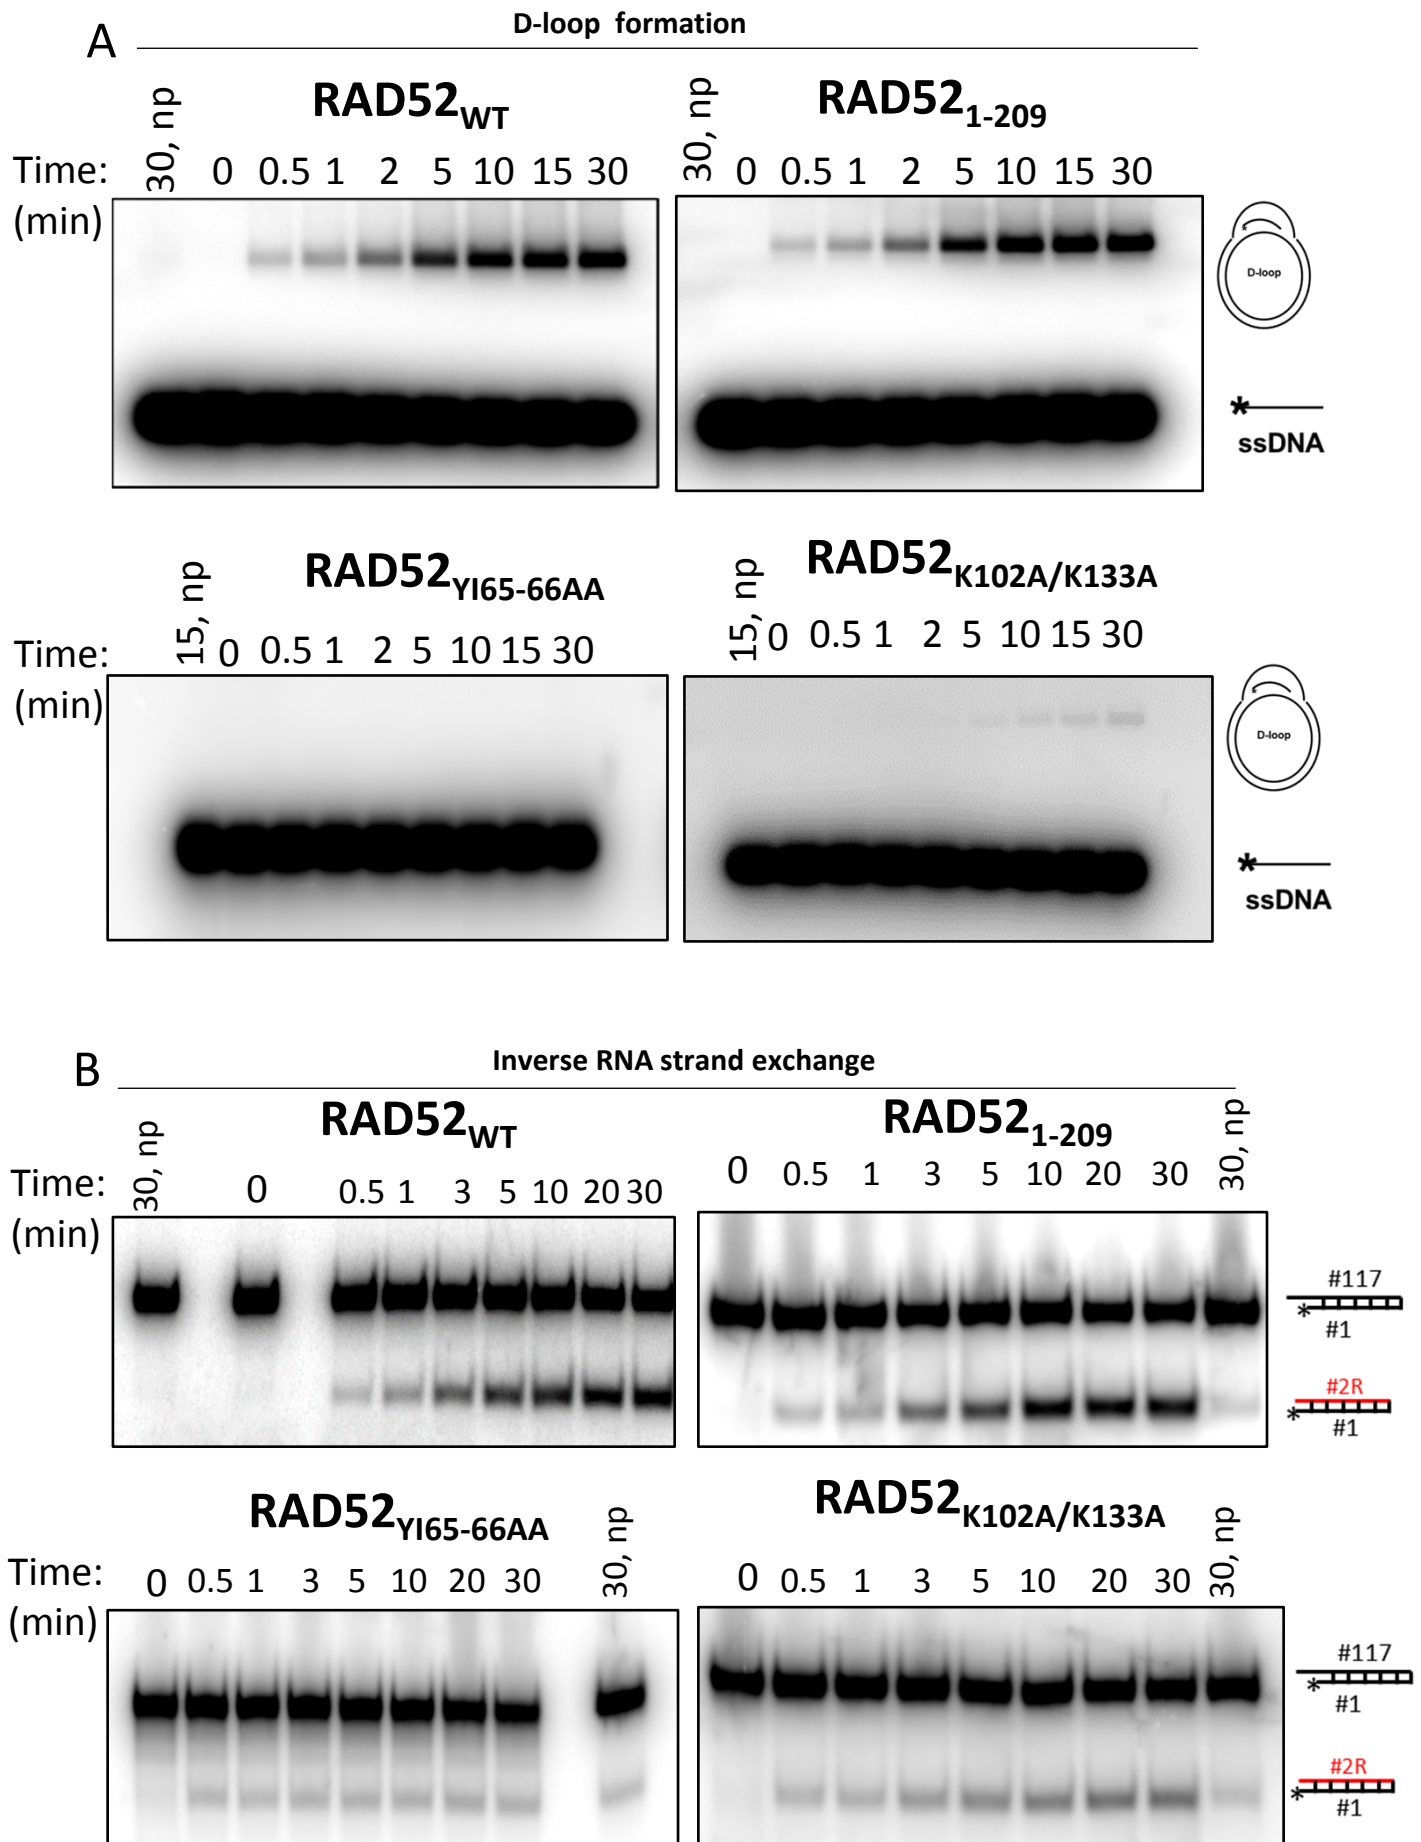

np: no protein

### Figure S3

D-loop formation and inverse RNA strand exchange activity of RAD52<sub>WT</sub> and RAD52 mutants. (A) Representative images of agarose gels containing D-loops formed by for RAD52<sub>WT</sub>, RAD52<sub>1-209</sub>, RAD52<sub>Y165-66AA</sub> or RAD52<sub>K102A/K133A</sub>. The gels were quantified, and the data presented graphically in Figure 3C. (B) Representative images of polyacrylamide gels after inverse RNA strand exchange assay for RAD52<sub>WT</sub>, RAD52<sub>1-209</sub>, RAD52<sub>Y165-66AA</sub> and RAD52<sub>K102A/K133A</sub>. The gels were quantified, and the data presented graphically in Figure 3E. In “np: no protein” control, RAD52 protein was substituted by storage buffer.

Figure S4

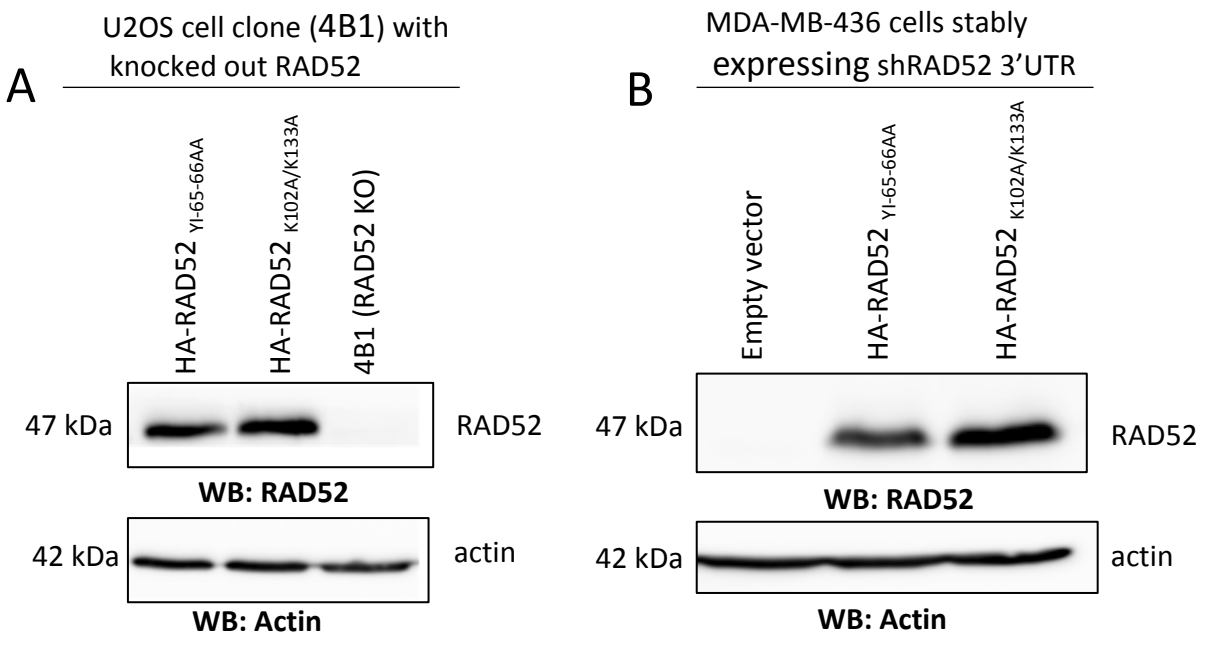

**C** MDA-MB-436 cell stably expressing shRAD52 + cisplatin (10  $\mu$ M)

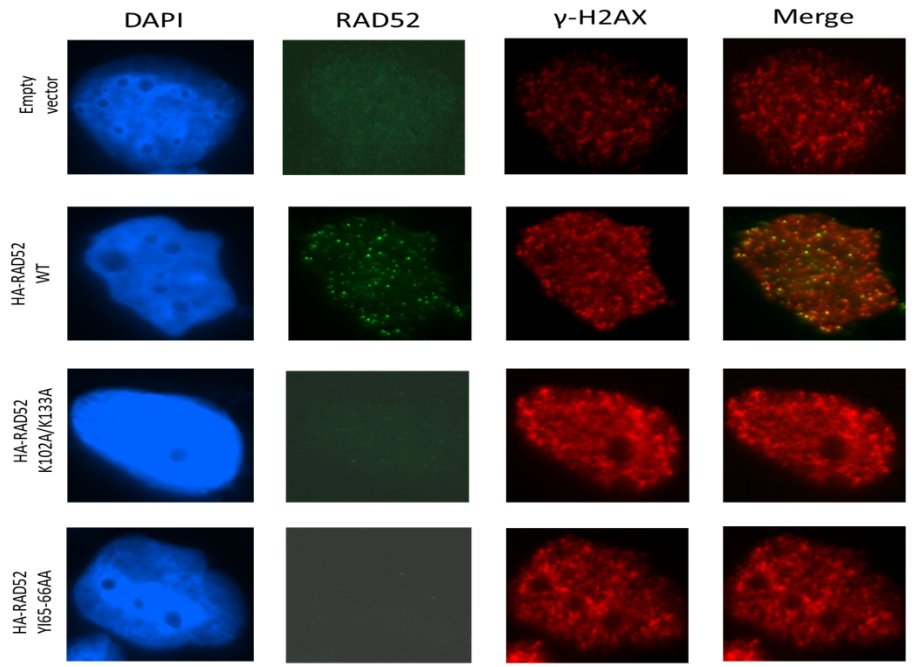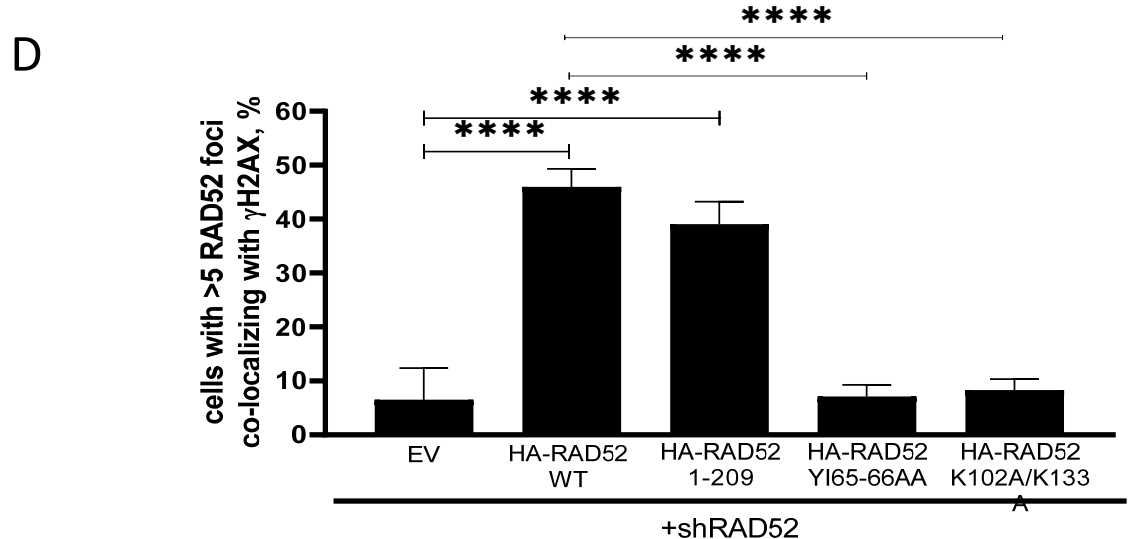



## Figure S4

RAD52<sup>Y165-66AA</sup> and RAD52<sup>K102A/K133A</sup> are incapable to form foci in response cisplatin treatment. (A) Western blot confirmation of knocked out of endogenous RAD52 (KO) and expression of exogenous RAD52<sup>Y165-66AA</sup> and RAD52<sup>K102A/K133A</sup> in U2OS cells. (B) Western blot confirmation of knocked-down endogenous RAD52 by stable expression of shRAD52 and expression of exogenous HA-RAD52<sup>WT</sup> or HA-RAD52<sup>1-209</sup> in MD-MB-436 cells. (C) Representative images of MDA-MB-436 cells stably expressing shRAD52 and RAD52<sup>Y165-66AA</sup> or RAD52<sup>K102A/K133A</sup>, stained 6 h after cisplatin (10  $\mu$ M) treatment with DAPI (blue), fluorescent anti-bodies for RAD52 (green) and  $\gamma$ -H2AX (red). (D) Quantification of RAD52 foci co-localized with  $\gamma$ -H2AX foci in MDA-MB-436 cells treated with shRAD52 and stably expressing indicated exogenous RAD52 protein.

Figure S5

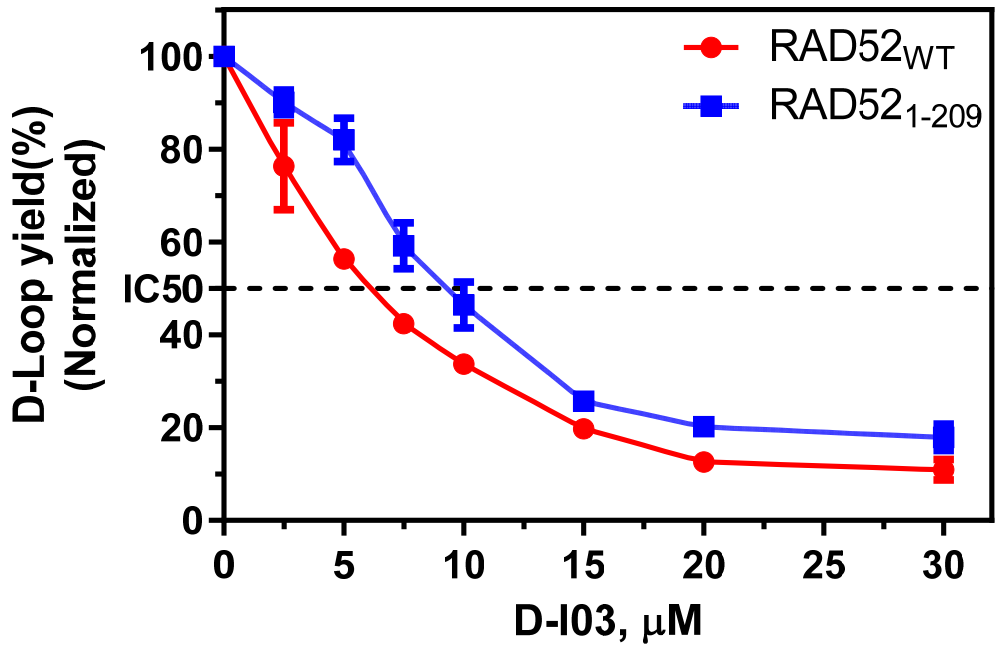

## Figure S5

D-I03 inhibits the D-loop activity of RAD52<sub>WT</sub> and RAD52<sub>1-209</sub> with a similar efficiency.

Table S1: Sequences of the oligonucleotides used in this study.

| Oligo name                                       | length | Sequence (5'-3')                                                                              |
|--------------------------------------------------|--------|-----------------------------------------------------------------------------------------------|
| 160                                              | 80     | AGCTTTGAGATGCTTGCTTATCAACAGAAGGAGTTACCTCGCGTTGCGTCTATTATGGTACCACACCAATCTTTCCAAGCAACG          |
| 1337-BHQ                                         | 39     | AGCACTGACTACTGTCGTCGATCATCGTGCATCACAGTG-BHQ1                                                  |
| 337-F                                            | 60     | FLU-CACTGTGATGCACGATGATCGACGACAGTAGTCAGTGCTGGGTCAACATCTGTATGCAGG                              |
| 1                                                | 63     | ACAGCACCAGATTCAGCAATTAAGCTCTAAGCCATCCGCAAAAATGACCTCTATCAAAAAGGA                               |
| 117                                              | 94     | TCCTTTTGATAAGAGGTCATTTTTGCGGATGGCTTAGAGCTTAATTGCTGATCTGGTGCTGTAGGTCAACATGTTGTAAATATGCAGCTAAAG |
| 2R                                               | 63     | UCCUUUUGAUAAGAGGUCAUUUUUGCGGAUGGCUUAGAGCUUAAUUGCUGAAUCUGGUGCUGU (ribonucleotide)              |
| RAD52 sgRNA L1 up F                              | 25     | CACCGCTAGGCTGGAGTCCGACCAG                                                                     |
| RAD52 sgRNA L1 up R                              | 25     | AAACCTGGTCGGACTCCAGCCTAGC                                                                     |
| RAD52 sgRNA R1 down F                            | 25     | CACCGACCCACAGCAGACTTTCAGC                                                                     |
| RAD52 sgRNA R1 down R                            | 25     | AAACGCTGAAAGTCTGCTGTGGGTC                                                                     |
| RAD52 check primer Forward                       | 20     | AATTCATGTGCCTGGAAAGC                                                                          |
| RAD52 check primer Reverse                       | 20     | CCCACGTAGAACTTGCCATT                                                                          |
| shRAD52 3'UTR Sigma SHCLND-NM_134424.2-1462s21c1 | 57     | CCGGATGAACGTCATTGCGATTTATCTCGAGATAAATCGCAATGACGTTCAATTTTTTG                                   |
| shControl Sigma SHC202                           | 57     | CCGGCAACAAGATGAAGAGCACCAACTCGAGTTGGTGCTCTTCATCTTGTGTTTTT                                      |
